# Supplementary material for: Determination of lead in human placenta tissue employing slurry sampling and detection by electrothermal atomic absorption spectrometry
Source: Royal Society of Chemistry journal article supplement (doi:10.1039/d0ay00848f), 2020-01-01
Supplement: d0ay00848f1.pdf [file d0ay00848f1.pdf]

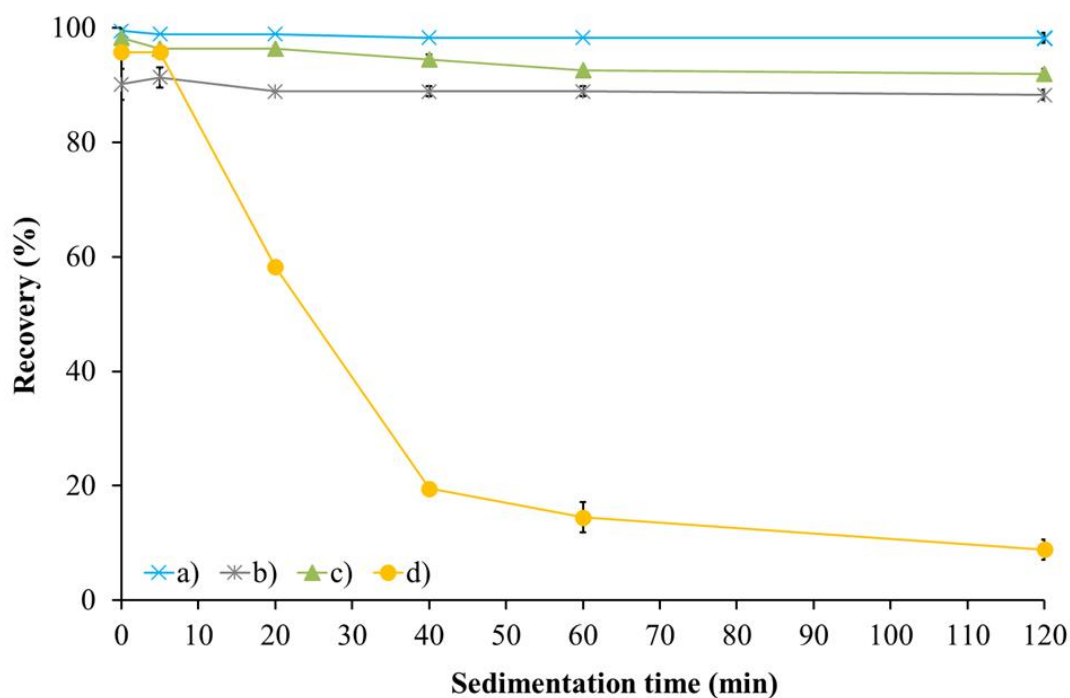

**Fig. S1.** Effect of various stabilising conditions on sedimentation time of slurries

a) without a stabilising agent with using DUSS-ETAAS b) 0.10% (v/v) Brij 35 in 0.20% (v/v) HNO<sub>3</sub> with using DUSS-ETAAS c) 0.10% (v/v) Tween 80 in 0.20% (v/v) HNO<sub>3</sub> with using DUSS-ETAAS d) without a stabilising agent only with using ETAAS (homogenisation by vortexing). The final concentration of Pb in the slurry was 50 µg L<sup>-1</sup>. Error bars indicate sample standard deviations (N = 6).
